# Supplementary material for: The Search for Therapeutic Bacteriophages Uncovers One New Subfamily and Two New Genera of Pseudomonas-Infecting Myoviridae
Source: PubMed Central journal article supplement (PMC4309531; doi:10.1371/journal.pone.0117163), 2015-01-28
Supplement: pone.0117163.s002.pdf [file pone.0117163.s002.pdf]

**Table S1:** Sequences and coordinates of the boundaries of highly covered regions of the six bacteriophage genomes reported.

| Highly covered regions |             | Start   | End     | Size |
|------------------------|-------------|---------|---------|------|
| PAK_P1                 | sequence    | AGCGA   | CGTGGTT | 1170 |
|                        | coordinates | 67966   | 69139   |      |
| PAK_P2                 | sequence    | AGCGA   | CGTGGTT | 1170 |
|                        | coordinates | 66530   | 67695   |      |
| PAK_P4                 | sequence    | AGCGA   | CGTGGTT | 1180 |
|                        | coordinates | 67395   | 68569   |      |
| CHA_P1                 | sequence    | AGCCATT | CTTGTT  | 756  |
|                        | coordinates | 62708   | 63463   |      |
| PAK_P3                 | sequence    | AGCCATT | CTTGTT  | 746  |
|                        | coordinates | 62771   | 63516   |      |
| PAK_P5                 | sequence    | AGCCATT | CTTGTT  | 760  |
|                        | coordinates | 62171   | 62930   |      |
