# Supplementary material for: The Search for Therapeutic Bacteriophages Uncovers One New Subfamily and Two New Genera of Pseudomonas-Infecting Myoviridae
Source: PubMed Central journal article supplement (PMC4309531; doi:10.1371/journal.pone.0117163), 2015-01-28
Supplement: pone.0117163.s003.pdf [file pone.0117163.s003.pdf]

**Table S2: Comparison of the codon usage of bacteriophages PAK\_P1 and PAK\_P3 with that of their host (PAK)**

|     |     | % of each codon per AA | % of each codon per AA | % codon usage [Phage] / % codon usage [PAK] |
|-----|-----|------------------------|------------------------|---------------------------------------------|
|     |     | <b>PAK</b>             | <b>PAK_P1</b>          |                                             |
| Phe | ttc | 0.95                   | 0.75                   | 0.79                                        |
| Phe | ttt | 0.05                   | 0.25                   | 5.21                                        |
| Leu | cta | 0.01                   | 0.19                   | 16.50                                       |
| Leu | tta | 0.00                   | 0.02                   | 9.95                                        |
| Leu | ttg | 0.07                   | 0.13                   | 1.86                                        |
| Leu | ctt | 0.03                   | 0.19                   | 7.29                                        |
| Leu | ctc | 0.22                   | 0.16                   | 0.73                                        |
| Leu | ctg | 0.67                   | 0.30                   | 0.45                                        |
| Ile | atc | 0.91                   | 0.55                   | 0.61                                        |
| Ile | att | 0.07                   | 0.38                   | 5.54                                        |
| Ile | ata | 0.02                   | 0.06                   | 2.92                                        |
| Pro | cca | 0.05                   | 0.18                   | 3.92                                        |
| Pro | cct | 0.05                   | 0.38                   | 7.92                                        |
| Pro | ccc | 0.30                   | 0.14                   | 0.48                                        |
| Pro | ccg | 0.76                   | 0.29                   | 0.39                                        |
| Tyr | tac | 0.80                   | 0.61                   | 0.77                                        |
| Tyr | tat | 0.20                   | 0.39                   | 1.89                                        |
| Gln | caa | 0.15                   | 0.49                   | 3.30                                        |
| Gln | cag | 0.85                   | 0.51                   | 0.60                                        |
| Asn | aac | 0.86                   | 0.65                   | 0.76                                        |
| Asn | aat | 0.14                   | 0.35                   | 2.43                                        |
| Lys | aaa | 0.13                   | 0.42                   | 3.34                                        |
| Lys | aag | 0.87                   | 0.58                   | 0.66                                        |
| Asp | gac | 0.80                   | 0.57                   | 0.71                                        |
| Asp | gat | 0.20                   | 0.43                   | 2.19                                        |
| Glu | gaa | 0.39                   | 0.46                   | 1.20                                        |
| Glu | gag | 0.61                   | 0.54                   | 0.88                                        |
| Cys | tgc | 0.90                   | 0.63                   | 0.70                                        |
| Cys | tgt | 0.10                   | 0.37                   | 3.75                                        |
| Trp | tgg | 1.00                   | 1.00                   | 1.00                                        |
| Arg | aga | 0.01                   | 0.16                   | 29.76                                       |
| Arg | cgt | 0.10                   | 0.24                   | 2.29                                        |
| Arg | cgc | 0.65                   | 0.17                   | 0.26                                        |
| Arg | cga | 0.03                   | 0.16                   | 4.96                                        |
| Arg | cgg | 0.18                   | 0.16                   | 0.88                                        |
| Arg | agg | 0.03                   | 0.11                   | 4.31                                        |
| Gly | gga | 0.05                   | 0.25                   | 5.18                                        |
| Gly | ggt | 0.10                   | 0.28                   | 2.85                                        |
| Gly | ggc | 0.73                   | 0.30                   | 0.41                                        |
| Gly | ggg | 0.12                   | 0.17                   | 1.41                                        |
|     |     |                        |                        |                                             |
|     |     |                        | <b>PAK_P3</b>          |                                             |
| Tyr | tac | 0.80                   | 0.72                   | 0.91                                        |
| Tyr | tat | 0.20                   | 0.28                   | 1.35                                        |
| Gln | caa | 0.15                   | 0.37                   | 2.49                                        |
| Gln | cag | 0.85                   | 0.63                   | 0.74                                        |
| Asn | aac | 0.86                   | 0.78                   | 0.91                                        |
| Asn | aat | 0.14                   | 0.22                   | 1.51                                        |

green, codons for which a tRNA is present in PAK\_P1 (light green, pseudo-tRNA).

purple, codons for which a tRNA is present in PAK\_P3.

yellow, the most frequently used codons.

pink, highest values per amino acid.

beige, lowest values per amino acid.
