# Supplementary material for: The Search for Therapeutic Bacteriophages Uncovers One New Subfamily and Two New Genera of Pseudomonas-Infecting Myoviridae
Source: PubMed Central journal article supplement (PMC4309531; doi:10.1371/journal.pone.0117163), 2015-01-28
Supplement: pone.0117163.s004.pdf [file pone.0117163.s004.pdf]

Table S3 Percentage of ORFs homologous between bacteriophages of the PAK\_P1-like and KPP10-like clades

| Name ( <i>number of predicted ORFs</i> ) | JG004                  | PAK_P1     | PAK_P2     | PAK_P4     | PaP1       | C2_10-Ab1  | PAK_P5     | CHA_P1     | KPP10      | LSL4       | PAK_P3     |
|------------------------------------------|------------------------|------------|------------|------------|------------|------------|------------|------------|------------|------------|------------|
| JG004 (161)                              | <b>100<sup>a</sup></b> | <b>89</b>  | <b>89</b>  | <b>88</b>  | <b>83</b>  | <b>84</b>  | 23         | 24         | 22         | 23         | 24         |
| PAK_P1 (181)                             | <b>79</b>              | <b>100</b> | <b>90</b>  | <b>90</b>  | <b>83</b>  | <b>78</b>  | 24         | 24         | 23         | 24         | 24         |
| PAK_P2 (175)                             | <b>82</b>              | <b>93</b>  | <b>100</b> | <b>95</b>  | <b>82</b>  | <b>77</b>  | 25         | 25         | 23         | 24         | 25         |
| PAK_P4 (174)                             | <b>82</b>              | <b>94</b>  | <b>95</b>  | <b>100</b> | <b>83</b>  | <b>78</b>  | 25         | 25         | 24         | 25         | 25         |
| PaP1 (157)                               | <b>85</b>              | <b>96</b>  | <b>91</b>  | <b>92</b>  | <b>100</b> | <b>84</b>  | 24         | 24         | 24         | 25         | 25         |
| C2_10-Ab1 (157)                          | <b>87</b>              | <b>90</b>  | <b>86</b>  | <b>86</b>  | <b>84</b>  | <b>100</b> | 24         | 24         | 24         | 25         | 25         |
| PAK_P5 (164)                             | 23                     | 27         | 26         | 27         | 23         | 23         | <b>100</b> | <b>96</b>  | <b>83</b>  | <b>94</b>  | <b>93</b>  |
| CHA_P1 (164)                             | 23                     | 26         | 26         | 26         | 23         | 23         | <b>96</b>  | <b>100</b> | <b>84</b>  | <b>93</b>  | <b>94</b>  |
| KPP10 (146)                              | 25                     | 28         | 28         | 29         | 26         | 25         | <b>93</b>  | <b>95</b>  | <b>100</b> | <b>91</b>  | <b>95</b>  |
| LSL4 (165)                               | 22                     | 27         | 25         | 26         | 24         | 24         | <b>93</b>  | <b>92</b>  | <b>81</b>  | <b>100</b> | <b>91</b>  |
| PAK_P3 (165)                             | 23                     | 27         | 26         | 27         | 24         | 24         | <b>93</b>  | <b>93</b>  | <b>84</b>  | <b>91</b>  | <b>100</b> |

<sup>a</sup>: in bold, percentages corresponding to the two clades
