# Supplementary material for: The Search for Therapeutic Bacteriophages Uncovers One New Subfamily and Two New Genera of Pseudomonas-Infecting Myoviridae
Source: PubMed Central journal article supplement (PMC4309531; doi:10.1371/journal.pone.0117163), 2015-01-28
Supplement: pone.0117163.s005.pdf [file pone.0117163.s005.pdf]

Table S4 List of the 404 protein families

| Family # |             |              |                  |                  |                  |                  |                  |                  |                  |                  |                  |
|----------|-------------|--------------|------------------|------------------|------------------|------------------|------------------|------------------|------------------|------------------|------------------|
| 1        | CHA_P10001  | KPP10_3      | LSL40018         | PAK_P500001      | PAK_P30001       | NC_019918_000580 | PJG4_059         | G171_gp112       | PAKP400001       | PAK_P200001      | PAK_P100001      |
| 2        | CHA_P10002  | LSL40019     | KPP10_4          | PAK_P500002      | PAK_P30002       | PAKP400002       | PAK_P200002      | NC_019918_000590 | G171_gp111       | PJG4_060         | PAK_P100002      |
| 3        | CHA_P10003  | PAK_P500003  | PAK_P30003       | LSL40020         | KPP10_5          | G171_gp110       | PAK_P200003      | PAKP400003       | NC_019918_000600 | PJG4_061         | PAK_P100003      |
| 4        | CHA_P10004  | PAK_P500004  | PAK_P30004       | LSL40021         | KPP10_6          | G171_gp109       | PAK_P200004      | NC_019918_000610 | PJG4_062         | PAKP400004       | PAK_P100004      |
| 5        | CHA_P10005  | PAK_P500005  | PAK_P30005       | LSL40022         | KPP10_7          | PAKP400005       | PAK_P200005      | NC_019918_000620 | PJG4_063         | G171_gp108       | PAK_P100005      |
| 6        | CHA_P10006  | KPP10_8      | LSL40023         | PAK_P30006       | PAK_P500006      | NC_019918_000630 | PJG4_064         | G171_gp107       | PAKP400006       | PAK_P200006      | PAK_P100006      |
| 7        | CHA_P10007  | PAK_P500007  | LSL40024         | KPP10_9          | PAK_P30007       | NC_019918_000640 | PJG4_065         | G171_gp106       | PAKP400007       | PAK_P200007      | PAK_P100007      |
| 8        | CHA_P10009  | PAK_P500009  | PAK_P30009       | LSL40026         | KPP10_11         | NC_019918_000660 | G171_gp104       | PAKP400009       | PAK_P200009      | PJG4_067         | PAK_P100009      |
| 9        | CHA_P10011  | PAK_P500011  | LSL40028         | KPP10_13         | PAK_P30011       | PAK_P100011      | NC_019918_000680 | PAKP400011       | PAK_P200011      | G171_gp102       | PJG4_069         |
| 10       | CHA_P10012  | LSL40029     | KPP10_14         | PAK_P30012       | PAK_P500012      | NC_019918_000690 | PJG4_071         | G171_gp101       | PAKP400013       | PAK_P200012      | PAK_P100012      |
| 11       | CHA_P10014  | KPP10_16     | LSL40031         | PAK_P30014       | PAK_P30014       | PAKP400015       | G171_gp099       | PAK_P200014      | NC_019918_000710 | PJG4_073         | PAK_P100014      |
| 12       | CHA_P10018  | PAK_P500018  | PAK_P30018       | KPP10_20         | LSL40035         | G171_gp096       | PAKP400019       | PAK_P200018      | PJG4_077         | NC_019918_000740 | PAK_P100018      |
| 13       | CHA_P10019  | PAK_P500019  | PAK_P30019       | LSL40036         | KPP10_21         | PAK_P100019      | PAK_P200019      | NC_019918_000760 | G171_gp095       | PAKP400020       | PJG4_078         |
| 14       | CHA_P10021  | PAK_P500021  | KPP10_23         | PAK_P30021       | LSL40038         | LSL40038         | G171_gp093       | PAK_P200022      | PAK_P200021      | NC_019918_000780 | PJG4_080         |
| 15       | CHA_P10024  | PAK_P500025  | KPP10_26         | PAK_P30024       | LSL40041         | PAK_P100024      | PAKP400025       | PAK_P200024      | PJG4_083         | G171_gp090       | NC_019918_000810 |
| 16       | CHA_P10025  | LSL40042     | KPP10_27         | PAK_P30025       | PAK_P500026      | NC_019918_000820 | PAK_P100025      | G171_gp089       | PAKP400026       | PAK_P200025      | PJG4_084         |
| 17       | CHA_P10026  | PAK_P30026   | LSL40043         | KPP10_28         | PAK_P500027      | PAKP400027       | PAK_P200026      | G171_gp088       | PAKP400026       | NC_019918_000830 | PJG4_085         |
| 18       | CHA_P10028  | PAK_P500029  | PAK_P30028       | KPP10_30         | LSL40045         | G171_gp086       | PAKP400029       | PAK_P200028      | PAK_P100028      | NC_019918_000850 | PJG4_087         |
| 20       | CHA_P10066  | PAK_P30065   | PAK_P500066      | KPP10_64         | LSL40082         | PAK_P100076      | PAKP400075       | PAK_P200074      | PJG4_130         | NC_019918_001260 | G171_gp048       |
| 21       | CHA_P10092  | PAK_P500092  | KPP10_89         | PAK_P30092       | LSL40109         | PAK_P100109      | PJG4_161         | NC_019918_001550 | NC_019918_001550 | G171_gp017       | PAKP400108       |
| 22       | CHA_P10098  | PAK_P500098  | PAK_P30099       | LSL40115         | KPP10_94         | NC_019918_001580 | G171_gp014       | PAK_P100115      | PJG4_165         | PAK_P200111      | PAKP400110       |
| 23       | CHA_P10103  | PAK_P500103  | PAK_P30104       | LSL40121         | KPP10_98         | NC_019918_001610 | PJG4_167         | PAKP400114       | G171_gp011       | PAK_P100118      | PAK_P200115      |
| 24       | CHA_P10152c | PAK_P500153c | PAK_P30152c      | LSL40004c        | KPP10_135        | G171_gp129       | PAK_P100159c     | PAKP400153c      | PAK_P200154c     | NC_019918_000270 | PJG4_029         |
| 25       | CHA_P10155c | KPP10_138    | PAK_P500156c     | PAK_P30155c      | LSL40007c        | NC_019918_000340 | PJG4_035         | G171_gp123       | PAKP400159c      | PAK_P200160c     | PAK_P100166c     |
| 26       | CHA_P10156c | PAK_P500157c | PAK_P30156c      | LSL40008c        | KPP10_139        | PAKP400156c      | PAK_P200157c     | PAK_P100163c     | PJG4_032         | G171_gp126       | NC_019918_000310 |
| 27       | CHA_P10158c | LSL40010c    | KPP10_141        | PAK_P30158c      | LSL40009c        | PJG4_037         | G171_gp122       | PAK_P200162c     | PAKP400161c      | NC_019918_000350 | PAK_P100167c     |
| 28       | CHA_P10008  | PAK_P500008  | PAK_P30008       | LSL40025         | KPP10_10         | PAKP400008       | PAK_P200008      | PAK_P100008      | PJG4_066         | NC_019918_000650 |                  |
| 29       | CHA_P10013  | PAK_P500013  | PAK_P30013       | LSL40030         | KPP10_15         | PAK_P100013      | PAKP400014       | PAK_P200013      | NC_019918_000700 | PJG4_072         |                  |
| 30       | CHA_P10015  | PAK_P30015   | LSL40032         | KPP10_17         | PAK_P100015      | G171_gp098       | PAKP400016       | PAK_P200015      | NC_019918_000720 | PJG4_074         |                  |
| 31       | CHA_P10020  | PAK_P500020  | PAK_P30020       | LSL40037         | KPP10_22         | NC_019918_000770 | PAK_P200020      | PAK_P100020      | PJG4_079         | PAKP400021       |                  |
| 32       | CHA_P10032  | PAK_P30032   | LSL40049         | PAK_P500033      | PAK_P100032      | NC_019918_000880 | PJG4_091         | G171_gp083       | PAKP400033       | PAK_P200032      |                  |
| 33       | CHA_P10061  | LSL40077     | PAK_P500061      | PAK_P30060       | PJG4_118         | G171_gp060       | PAKP400062       | PAK_P100063      | NC_019918_001170 | PAK_P200062      |                  |
| 34       | CHA_P10082  | LSL40099     | PAK_P500082      | KPP10_81         | PAK_P30081       | G171_gp031       | PAKP400092       | PAK_P200092      | PAK_P100095      | NC_019918_001440 |                  |
| 35       | CHA_P10022  | LSL40039     | KPP10_24         | PAK_P30022       | PAK_P100022      | PJG4_081         | G171_gp092       | PAKP400023       | PAK_P200022      |                  |                  |
| 36       | CHA_P10027  | LSL40044     | PAK_P500028      | PAK_P30027       | G171_gp087       | PAKP400028       | PAK_P100027      | NC_019918_000840 | NC_019918_000840 |                  |                  |
| 37       | CHA_P10105  | G171_gp006   | PAK_P30106       | PAK_P500106      | LSL40125         | PAK_P100124      | PJG4_170         | PAKP400118       | PAK_P200119      |                  |                  |
| 38       | CHA_P10117  | LSL40137     | PAK_P500116      | KPP10_107        | PAK_P30118       | CHA_P10118       | LSL40138         | PAK_P500117      | PAK_P30119       |                  |                  |
| 39       | PJG4_090    | PAKP400032   | PAK_P200031      | PAK_P100031      | PJG4_150         | G171_gp027       | PAKP400096       | PAK_P200096      | PAK_P100099      |                  |                  |
| 40       | PJG4_108    | PAK_P200051  | NC_019918_001050 | PAKP400051       | PAK_P100052      | PJG4_109         | G171_gp070       | PAKP400052       | PAK_P100053      |                  |                  |
| 41       | PJG4_122    | PAKP400066   | G171_gp056       | NC_019918_001200 | PAK_P100067      | PAK_P200066      | PAK_P100068      | PAKP400067       | PAK_P200067      |                  |                  |
| 42       | PJG4_149    | PAKP400095   | PAK_P200095      | NC_019918_001460 | PAK_P100098      | KPP10_82         | LSL40100         | PAK_P500083      | PAK_P30083       |                  |                  |
| 43       | CHA_P10033  | PAK_P30033   | LSL40050         | KPP10_33         | PAK_P500034      | PAKP400034       | PAK_P200033      | PAK_P100033      |                  |                  |                  |
| 44       | CHA_P10100  | LSL40117     | KPP10_96         | PAK_P500100      | PAK_P30101       | PAKP400113       | PAK_P200114      |                  |                  |                  |                  |
| 45       | CHA_P10135  | PAK_P500134  | KPP10_120        | PAK_P30135       | PAKP400079       | PAK_P200078      | PAK_P100080      |                  |                  |                  |                  |
| 46       | PJG4_134    | PAKP400080   | PAK_P200079      | PAK_P100081      | PAK_P100171c     | G171_gp119       | PAKP400165c      |                  |                  |                  |                  |
| 47       | PJG4_172    | PAKP400119   | PAK_P100126      | KPP10_100        | NC_019918_001680 | G171_gp005       | PAK_P30108       |                  |                  |                  |                  |
| 48       | PJG4_001    | PAK_P100130  | G171_gp001       | PAKP400123       | NC_019918_001690 | NC_019918_000010 | PAK_P200124      |                  |                  |                  |                  |
| 49       | CHA_P10016  | PAK_P500016  | PAK_P30016       | LSL40033         | KPP10_18         | PAK_P100016      |                  |                  |                  |                  |                  |
| 50       | CHA_P10101  | PAK_P500101  | KPP10_97         | PAK_P30102       | LSL40118         | PAK_P100119      |                  |                  |                  |                  |                  |
| 51       | CHA_P10107  | PAK_P500108  | LSL40128         | PAKP400120       | PAK_P200121      | PAK_P100128      |                  |                  |                  |                  |                  |
| 52       | CHA_P10134  | PAK_P500133  | LSL40154         | KPP10_119        | PAK_P100084      | G171_gp041       |                  |                  |                  |                  |                  |
| 53       | PJG4_068    | G171_gp103   | PAK_P200010      | PAK_P100010      | PAKP400010       | NC_019918_000670 |                  |                  |                  |                  |                  |
| 54       | PJG4_076    | G171_gp097   | PAKP400018       | PAK_P200017      | NC_019918_000730 | PAK_P100017      |                  |                  |                  |                  |                  |
| 55       | PJG4_082    | PAK_P200023  | NC_019918_000800 | G171_gp091       | PAKP400024       | PAK_P100023      |                  |                  |                  |                  |                  |
| 56       | PJG4_088    | G171_gp085   | PAKP400030       | PAK_P200029      | NC_019918_000860 | PAK_P100029      |                  |                  |                  |                  |                  |
| 57       | PJG4_089    | G171_gp084   | PAKP400031       | PAK_P200030      | NC_019918_000870 | PAK_P100030      |                  |                  |                  |                  |                  |
| 58       | PJG4_092    | PAKP400035c  | NC_019918_000890 | PAK_P200034c     | PAK_P100034c     | G171_gp082       |                  |                  |                  |                  |                  |

|     |            |                  |                  |                  |                  |                  |
|-----|------------|------------------|------------------|------------------|------------------|------------------|
| 59  | PJG4_094   | PAKP400037c      | G171_gp081       | PAK_P100036c     | NC_019918_000910 | PAK_P200036c     |
| 60  | PJG4_096   | PAKP400039c      | NC_019918_000920 | PAK_P200038c     | G171_gp079       | PAK_P100038c     |
| 61  | PJG4_101   | PAKP400041       | PAK_P200041      | NC_019918_000950 | G171_gp078       | PAK_P100041      |
| 62  | PJG4_104   | G171_gp075       | PAK_P200045      | NC_019918_001000 | PAKP400045       | PAK_P100045      |
| 63  | PJG4_105   | PAKP400046       | G171_gp074       | PAK_P200046      | PAK_P100046      | NC_019918_001010 |
| 64  | PJG4_106   | PAKP400047       | PAK_P100047      | G171_gp073       | PAK_P200047      | NC_019918_001020 |
| 65  | PJG4_110   | G171_gp069       | PAKP400053       | PAK_P200053      | PAK_P100054      | NC_019918_001070 |
| 66  | PJG4_111   | G171_gp068       | NC_019918_001080 | PAKP400054       | PAK_P100055      | PAK_P200054      |
| 67  | PJG4_113   | G171_gp065       | PAKP400057       | PAK_P200057      | NC_019918_001110 | PAK_P100058      |
| 68  | PJG4_114   | G171_gp064       | PAKP400058       | PAK_P200058      | NC_019918_001120 | PAK_P100059      |
| 69  | PJG4_115   | G171_gp063       | PAK_P200059      | PAK_P100060      | PAKP400059       | NC_019918_001140 |
| 70  | PJG4_116   | G171_gp062       | PAK_P200060      | PAKP400060       | NC_019918_001150 | PAK_P100061      |
| 71  | PJG4_117   | G171_gp061       | PAKP400061       | PAK_P200061      | NC_019918_001160 | PAK_P100062      |
| 72  | PJG4_119   | G171_gp059       | PAKP400063       | PAK_P100064      | NC_019918_001180 | PAK_P200063      |
| 73  | PJG4_121   | G171_gp057       | PAKP400065       | NC_019918_001190 | PAK_P200065      | PAK_P100066      |
| 74  | PJG4_124   | G171_gp054       | PAKP400068       | PAK_P200068      | NC_019918_001210 | PAK_P100069      |
| 75  | PJG4_127   | PAKP400071       | PAK_P200071      | PAK_P100072      | NC_019918_001230 | G171_gp051       |
| 76  | PJG4_131   | G171_gp047       | PAKP400076       | PAK_P200075      | PAK_P100077      | NC_019918_001270 |
| 77  | PJG4_132   | PAKP400077       | PAK_P200076      | G171_gp046       | NC_019918_001280 | PAK_P100078      |
| 78  | PJG4_133   | PAK_P200077      | PAKP400078       | PAK_P100079      | NC_019918_001290 | G171_gp045       |
| 79  | PJG4_135   | PAK_P200080      | NC_019918_001310 | PAKP400081       | PAK_P100082      | G171_gp043       |
| 80  | PJG4_136   | PAK_P200081      | NC_019918_001320 | PAKP400082       | G171_gp042       | PAK_P100083      |
| 81  | PJG4_139   | G171_gp037       | NC_019918_001360 | PAKP400086       | PAK_P200085      | PAK_P100088      |
| 82  | PJG4_140   | PAKP400087       | PAK_P200086      | PAK_P100089      | NC_019918_001370 | G171_gp036       |
| 83  | PJG4_143   | PAK_P100092      | PAKP400090       | NC_019918_001400 | NC_P200089       | G171_gp033       |
| 84  | PJG4_146   | PAKP400091       | PAK_P200091      | G171_gp032       | PAK_P100094      | NC_019918_001430 |
| 85  | PJG4_148   | G171_gp029       | PAKP400094       | PAK_P200094      | PAK_P100097      | NC_019918_001450 |
| 86  | PJG4_151   | PAK_P100100      | NC_019918_001470 | NC_019918_001470 | PAKP400097       | PAK_P200097      |
| 87  | PJG4_153   | NC_019918_001480 | PAKP400099       | PAK_P200100      | G171_gp024       | PAK_P100103      |
| 88  | PJG4_156   | PAK_P200104      | G171_gp022       | NC_019918_001510 | PAK_P100107      | PAKP400102       |
| 89  | PJG4_160   | PAKP400107       | PAK_P200108      | G171_gp018       | PAK_P100111      | NC_019918_001540 |
| 90  | PJG4_162   | PAKP400109       | PAK_P200110      | G171_gp016       | PAK_P100113      | NC_019918_001560 |
| 91  | PJG4_166   | PAKP400112       | PAK_P200113      | G171_gp012       | PAK_P100117      | NC_019918_001600 |
| 92  | PJG4_169   | NC_019918_001640 | G171_gp008       | PAKP400117       | PAK_P200118      | PAK_P100122      |
| 93  | PJG4_004   | G171_gp156       | PAKP400125c      | PAK_P200126c     | NC_019918_000020 | PAK_P100132c     |
| 94  | PJG4_005   | PAK_P200127c     | G171_gp155       | PAKP400126c      | NC_019918_000030 | PAK_P100133c     |
| 95  | PJG4_007   | G171_gp153       | PAKP400128c      | PAK_P100135c     | PAK_P200129c     | NC_019918_000050 |
| 96  | PJG4_009   | G171_gp151       | PAK_P100137c     | PAK_P200131c     | PAKP400130c      | NC_019918_000070 |
| 97  | PJG4_010   | G171_gp150       | PAK_P200132c     | PAKP400131c      | NC_019918_000080 | PAK_P100138c     |
| 98  | PJG4_011   | PAKP400134c      | NC_019918_000110 | G171_gp148       | PAK_P200135c     | PAK_P100140c     |
| 99  | PJG4_012   | PAK_P200136c     | G171_gp147       | PAKP400135c      | NC_019918_000120 | PAK_P100141c     |
| 100 | PJG4_016   | PAKP400140c      | PAK_P100146c     | PAK_P200141c     | G171_gp142       | NC_019918_000150 |
| 101 | PJG4_018   | PAKP400142c      | PAK_P100148c     | PAK_P200143c     | NC_019918_000170 | G171_gp140       |
| 102 | PJG4_020   | NC_019918_000190 | PAK_P100150c     | PAK_P200145c     | G171_gp138       | PAKP400144c      |
| 103 | PJG4_022   | G171_gp136       | PAK_P100152c     | PAK_P200147c     | NC_019918_000210 | PAKP400146c      |
| 104 | PJG4_023   | NC_019918_000220 | PAK_P200148c     | PAKP400147c      | PAK_P100153c     | G171_gp135       |
| 105 | PJG4_024   | PAKP400148c      | PAK_P200149c     | NC_019918_000230 | PAK_P100154c     | G171_gp134       |
| 106 | PJG4_026   | PAKP400150c      | PAK_P200151c     | NC_019918_000240 | PAK_P100156c     | G171_gp132       |
| 107 | PJG4_028   | PAKP400152c      | PAK_P200153c     | NC_019918_000260 | G171_gp130       | PAK_P100158c     |
| 108 | PJG4_030   | PAK_P100161c     | PAK_P200155c     | NC_019918_000290 | G171_gp128       | PAKP400154c      |
| 109 | PJG4_031   | G171_gp127       | PAKP400155c      | NC_019918_000300 | PAK_P100162c     | PAK_P200156c     |
| 110 | PJG4_033   | G171_gp125       | NC_019918_000320 | PAKP400157c      | PAK_P200158c     | PAK_P100164c     |
| 111 | PJG4_034   | G171_gp124       | PAK_P200159c     | PAK_P100165c     | NC_019918_000330 | PAKP400158c      |
| 112 | PJG4_038   | PAK_P100168c     | NC_019918_000360 | G171_gp121       | PAKP400162c      | PAK_P200163c     |
| 113 | PJG4_041   | PAKP400166c      | NC_019918_000390 | PAK_P100172c     | G171_gp118       | PAK_P200167c     |
| 114 | PJG4_042   | PAKP400167c      | NC_019918_000400 | PAK_P200168c     | PAK_P100173c     | G171_gp117       |
| 115 | PJG4_043   | PAKP400168c      | PAK_P200169c     | NC_019918_000410 | PAK_P100174c     | G171_gp116       |
| 116 | PJG4_044   | G171_gp115       | PAK_P200170c     | PAK_P100175c     | NC_019918_000420 | PAKP400169c      |
| 117 | PJG4_045   | G171_gp113       | PAKP400171       | PAK_P200172      | NC_019918_000450 | PAK_P100177      |
| 118 | CHA_P10010 | PAK_P500010      | PAK_P30010       | KPP10_12         | LSL40027         |                  |
| 119 | CHA_P10017 | PAK_P500017      | PAK_P30017       | LSL40034         | KPP10_19         |                  |

|     |            |             |             |             |             |
|-----|------------|-------------|-------------|-------------|-------------|
| 120 | CHA_P10023 | PAK_P500024 | PAK_P30023  | KPP10_25    | LSL40040    |
| 121 | CHA_P10029 | PAK_P500030 | PAK_P30029  | LSL40046    | KPP10_31    |
| 122 | CHA_P10035 | PAK_P30034  | KPP10_34    | PAK_P500035 | LSL40051    |
| 123 | CHA_P10036 | PAK_P500036 | PAK_P30035  | LSL40052    | KPP10_35    |
| 124 | CHA_P10039 | PAK_P30038  | KPP10_37    | LSL40055    | PAK_P500039 |
| 125 | CHA_P10041 | PAK_P500041 | PAK_P30040  | LSL40057    | KPP10_39    |
| 126 | CHA_P10042 | PAK_P500042 | PAK_P30041  | LSL40058    | KPP10_40    |
| 127 | CHA_P10043 | PAK_P500043 | LSL40059    | KPP10_41    | PAK_P30042  |
| 128 | CHA_P10044 | PAK_P500044 | LSL40060    | KPP10_42    | PAK_P30043  |
| 129 | CHA_P10045 | PAK_P500045 | LSL40061    | KPP10_43    | PAK_P30044  |
| 130 | CHA_P10046 | PAK_P500046 | PAK_P30045  | LSL40062    | KPP10_44    |
| 131 | CHA_P10047 | PAK_P30046  | LSL40063    | PAK_P500047 | KPP10_45    |
| 132 | CHA_P10048 | PAK_P30047  | LSL40064    | PAK_P500048 | KPP10_46    |
| 133 | CHA_P10049 | PAK_P500049 | PAK_P30048  | LSL40065    | KPP10_47    |
| 134 | CHA_P10050 | PAK_P30049  | PAK_P500050 | LSL40066    | KPP10_48    |
| 135 | CHA_P10051 | PAK_P30050  | PAK_P500051 | LSL40067    | KPP10_49    |
| 136 | CHA_P10052 | PAK_P30051  | KPP10_50    | PAK_P500052 | LSL40068    |
| 137 | CHA_P10053 | PAK_P30052  | LSL40069    | KPP10_51    | PAK_P500053 |
| 138 | CHA_P10054 | PAK_P30053  | PAK_P500054 | LSL40070    | KPP10_52    |
| 139 | CHA_P10055 | PAK_P30054  | KPP10_53    | PAK_P500055 | LSL40071    |
| 140 | CHA_P10056 | PAK_P30055  | LSL40072    | KPP10_54    | PAK_P500056 |
| 141 | CHA_P10057 | PAK_P30056  | LSL40073    | KPP10_55    | PAK_P500057 |
| 142 | CHA_P10058 | PAK_P500058 | PAK_P30057  | LSL40074    | KPP10_56    |
| 143 | CHA_P10059 | PAK_P500059 | PAK_P30058  | LSL40075    | KPP10_57    |
| 144 | CHA_P10060 | PAK_P500060 | PAK_P30059  | LSL40076    | KPP10_58    |
| 145 | CHA_P10062 | PAK_P500062 | KPP10_60    | LSL40078    | PAK_P30061  |
| 146 | CHA_P10063 | PAK_P500063 | LSL40079    | KPP10_61    | PAK_P30062  |
| 147 | CHA_P10064 | PAK_P500064 | PAK_P30063  | LSL40080    | KPP10_62    |
| 148 | CHA_P10065 | LSL40081    | PAK_P500065 | PAK_P30064  | KPP10_63    |
| 149 | CHA_P10067 | PAK_P500067 | PAK_P30066  | LSL40083    | KPP10_65    |
| 150 | CHA_P10068 | PAK_P500068 | PAK_P30067  | LSL40084    | KPP10_66    |
| 151 | CHA_P10069 | PAK_P30068  | LSL40085    | KPP10_67    | PAK_P500069 |
| 152 | CHA_P10070 | PAK_P500070 | LSL40086    | KPP10_68    | PAK_P30069  |
| 153 | CHA_P10071 | LSL40087    | PAK_P500071 | PAK_P30070  | KPP10_69    |
| 154 | CHA_P10072 | LSL40088    | PAK_P30071  | PAK_P500072 | KPP10_70    |
| 155 | CHA_P10073 | LSL40089    | PAK_P500073 | PAK_P30072  | KPP10_71    |
| 156 | CHA_P10074 | LSL40090    | KPP10_72    | PAK_P30073  | PAK_P500074 |
| 157 | CHA_P10075 | LSL40091    | PAK_P500075 | PAK_P30074  | KPP10_73    |
| 158 | CHA_P10077 | LSL40093    | PAK_P30076  | PAK_P500077 | KPP10_75    |
| 159 | CHA_P10078 | LSL40094    | PAK_P30077  | KPP10_76    | PAK_P500078 |
| 160 | CHA_P10079 | LSL40095    | KPP10_77    | PAK_P500079 | PAK_P30078  |
| 161 | CHA_P10080 | PAK_P500080 | LSL40096    | KPP10_78    | PAK_P30079  |
| 162 | CHA_P10081 | PAK_P500081 | LSL40097    | KPP10_79    | PAK_P30080  |
| 163 | CHA_P10085 | LSL40102    | PAK_P500085 | PAK_P30085  | KPP10_83    |
| 164 | CHA_P10086 | LSL40103    | PAK_P500086 | PAK_P30086  | KPP10_84    |
| 165 | CHA_P10087 | PAK_P500087 | PAK_P30087  | LSL40104    | KPP10_85    |
| 166 | CHA_P10088 | PAK_P30088  | LSL40105    | KPP10_86    | PAK_P500088 |
| 167 | CHA_P10091 | PAK_P500091 | KPP10_88    | PAK_P30091  | LSL40108    |
| 168 | CHA_P10093 | LSL40110    | PAK_P30093  | KPP10_90    | PAK_P500093 |
| 169 | CHA_P10095 | LSL40112    | KPP10_91    | PAK_P30096  | PAK_P500095 |
| 170 | CHA_P10096 | PAK_P30097  | LSL40113    | PAK_P500096 | KPP10_92    |
| 171 | CHA_P10097 | LSL40114    | PAK_P500097 | KPP10_93    | PAK_P30098  |
| 172 | CHA_P10099 | LSL40116    | PAK_P500099 | KPP10_95    | PAK_P30100  |
| 173 | CHA_P10108 | KPP10_102   | PAK_P30111  | PAK_P500109 | LSL40129    |
| 174 | CHA_P10115 | KPP10_105   | PAK_P500114 | LSL40135    | PAK_P30116  |
| 175 | CHA_P10116 | LSL40136    | PAK_P500115 | KPP10_106   | PAK_P30117  |
| 176 | CHA_P10120 | PAK_P500119 | LSL40140    | PAK_P30121  | KPP10_109   |
| 177 | CHA_P10121 | PAK_P500120 | PAK_P30122  | KPP10_110   | LSL40141    |
| 178 | CHA_P10122 | PAK_P30123  | PAK_P500121 | LSL40142    | KPP10_111   |
| 179 | CHA_P10124 | LSL40144    | PAK_P500123 | PAK_P30125  | KPP10_112   |
| 180 | CHA_P10125 | PAK_P500125 | PAK_P30127  | LSL40146    | KPP10_113   |

|     |                  |              |              |                  |                  |
|-----|------------------|--------------|--------------|------------------|------------------|
| 181 | CHA_P10126       | PAK_P30128   | KPP10_114    | PAK_P500126      | LSL40147         |
| 182 | CHA_P10129       | KPP10_116    | PAK_P500129  | PAK_P30132       | LSL40150         |
| 183 | CHA_P10139c      | PAK_P500140c | PAK_P30139c  | KPP10_123        | LSL40158c        |
| 184 | CHA_P10140c      | PAK_P500141c | PAK_P30140c  | KPP10_124        | LSL40159c        |
| 185 | CHA_P10141c      | PAK_P500142c | PAK_P30141c  | KPP10_125        | LSL40160c        |
| 186 | CHA_P10142c      | PAK_P500143c | LSL40161c    | PAK_P30142c      | KPP10_126        |
| 187 | CHA_P10143c      | PAK_P500144c | PAK_P30143c  | LSL40162c        | KPP10_127        |
| 188 | CHA_P10144c      | PAK_P500145c | PAK_P30144c  | KPP10_128        | LSL40163c        |
| 189 | CHA_P10145c      | PAK_P500146c | KPP10_129    | PAK_P30145c      | LSL40164c        |
| 190 | CHA_P10147c      | KPP10_130    | PAK_P30147c  | LSL40166c        | PAK_P500148c     |
| 191 | CHA_P10150c      | LSL40002c    | PAK_P30150c  | KPP10_133        | PAK_P500151c     |
| 192 | CHA_P10151c      | KPP10_134    | PAK_P30151c  | LSL40003c        | PAK_P500152c     |
| 193 | CHA_P10153c      | PAK_P500154c | PAK_P30153c  | LSL40005c        | KPP10_136        |
| 194 | CHA_P10154c      | PAK_P30154c  | KPP10_137    | LSL40006c        | PAK_P500155c     |
| 195 | CHA_P10157c      | PAK_P500158c | KPP10_140    | LSL40009c        | PAK_P30157c      |
| 196 | CHA_P10159c      | KPP10_142    | PAK_P500160c | PAK_P30159c      | LSL40011c        |
| 197 | CHA_P10160c      | KPP10_143    | PAK_P30160c  | LSL40012c        | PAK_P500161c     |
| 198 | CHA_P10162       | PAK_P30162   | LSL40013     | KPP10_144        | PAK_P500163      |
| 199 | CHA_P10163       | PAK_P500164  | PAK_P30163   | LSL40014         | KPP10_145        |
| 200 | CHA_P10164       | PAK_P500165  | PAK_P30164   | LSL40015         | KPP10_146        |
| 201 | CHA_P10165       | KPP10_1      | PAK_P30165   | PAK_P500166      | LSL40016         |
| 202 | CHA_P10166       | PAK_P500167  | KPP10_2      | LSL40017         | PAK_P30166       |
| 203 | PJG4_093         | PAKP400036c  | PAK_P200035c | PAK_P100035c     | NC_019918_000900 |
| 204 | PJG4_095         | PAKP400038c  | PAK_P100037c | PAK_P200037c     | G171_gp080       |
| 205 | PJG4_112         | PAKP400055   | PAK_P100056  | G171_gp067       | PAK_P200055      |
| 206 | PJG4_120         | G171_gp058   | PAKP400064   | PAK_P200064      | PAK_P100065      |
| 207 | PJG4_125         | PAK_P200069  | G171_gp053   | PAKP400069       | PAK_P100070      |
| 208 | PJG4_126         | G171_gp052   | PAK_P200070  | PAK_P100071      | PAKP400070       |
| 209 | PJG4_129         | PAKP400073   | PAK_P100074  | PAK_P200073      | NC_019918_001250 |
| 210 | PJG4_138         | G171_gp038   | PAK_P100087  | PAK_P200084      | PAKP400085       |
| 211 | PJG4_141         | PAKP400088   | PAK_P200087  | G171_gp035       | PAK_P100090      |
| 212 | PJG4_154         | G171_gp023   | PAKP400100   | NC_019918_001490 | PAK_P100105      |
| 213 | PJG4_155         | PAKP400101   | PAK_P200103  | PAK_P100106      | NC_019918_001500 |
| 214 | PJG4_158         | PAK_P200106  | PAKP400105   | PAK_P100109      | G171_gp020       |
| 215 | PJG4_159         | PAKP400106   | PAK_P200107  | NC_019918_001530 | PAK_P100110      |
| 216 | PJG4_006         | PAK_P200128c | PAKP400127c  | NC_019918_000040 | PAK_P100134c     |
| 217 | PJG4_008         | PAKP400129c  | PAK_P200130c | NC_019918_000060 | G171_gp152       |
| 218 | PJG4_015         | PAKP400139c  | PAK_P200140c | G171_gp143       | PAK_P100145c     |
| 219 | PJG4_021         | PAK_P100151c | PAKP400145c  | NC_019918_000200 | PAK_P200146c     |
| 220 | PJG4_025         | PAKP400149c  | PAK_P200150c | PAK_P100155c     | G171_gp133       |
| 221 | PJG4_027         | PAKP400151c  | PAK_P200152c | G171_gp131       | PAK_P100157c     |
| 222 | NC_019918_000130 | PAKP400136c  | PAK_P200137c | G171_gp146       | PAK_P100142c     |
| 223 | NC_019918_000440 | G171_gp114   | PAKP400170   | PAK_P200171      | PAK_P100176      |
| 224 | NC_019918_001100 | G171_gp066   | PAKP400056   | PAK_P200056      | PAK_P100057      |
| 225 | NC_019918_001340 | PAKP400084   | PAK_P200083  | PAK_P100086      | G171_gp039       |
| 226 | NC_019918_001590 | PAKP400111   | PAK_P200112  | G171_gp013       | PAK_P100116      |
| 227 | NC_019918_001630 | G171_gp009   | PAK_P100120  | PAKP400116       | PAK_P200117      |
| 228 | PAK_P100096      | G171_gp030   | PAK_P200093  | PAKP400093       | PAK_P30082       |
| 229 | CHA_P10030       | PAK_P500031  | PAK_P30030   | LSL40047         |                  |
| 230 | CHA_P10031       | PAK_P500032  | PAK_P30031   | LSL40048         |                  |
| 231 | CHA_P10037       | PAK_P30036   | PAK_P500037  | LSL40053         |                  |
| 232 | CHA_P10038       | PAK_P30037   | LSL40054     | PAK_P500038      |                  |
| 233 | CHA_P10084       | PAK_P500084  | PAK_P30084   | LSL40101         |                  |
| 234 | CHA_P10089       | PAK_P500089  | PAK_P30089   | LSL40106         |                  |
| 235 | CHA_P10109       | PAK_P500110  | LSL40130     | KPP10_103        |                  |
| 236 | CHA_P10114       | PAK_P500113  | LSL40134     | PAK_P30115       |                  |
| 237 | CHA_P10119       | LSL40139     | PAK_P500118  | PAK_P30120       |                  |
| 238 | CHA_P10123       | LSL40143     | PAK_P500122  | PAK_P30124       |                  |
| 239 | CHA_P10127       | PAK_P500127  | LSL40148     | PAK_P30130       |                  |
| 240 | CHA_P10128       | PAK_P500128  | PAK_P30131   | LSL40149         |                  |
| 241 | CHA_P10133       | PAK_P500132  | LSL40153     | KPP10_118        |                  |

|     |                  |                  |                  |                  |
|-----|------------------|------------------|------------------|------------------|
| 242 | CHA_P10137       | PAK_P500138      | PAK_P30137       | LSL40156         |
| 243 | CHA_P10146c      | PAK_P30146c      | LSL40165c        | PAK_P500147c     |
| 244 | CHA_P10148c      | PAK_P30148c      | KPP10_131        | PAK_P500149c     |
| 245 | PJG4_102         | PAKP400042       | PAK_P200042      | PAK_P100042      |
| 246 | PJG4_128         | PAKP400072       | PAK_P200072      | PAK_P100073      |
| 247 | PJG4_137         | PAKP400083       | PAK_P200082      | NC_019918_001330 |
| 248 | PJG4_144         | PAK_P200090      | NC_019918_001410 | PAK_P100093      |
| 249 | PJG4_152         | PAKP400098       | PAK_P200098      | PAK_P100101      |
| 250 | PJG4_163         | NC_019918_001570 | PAK_P100114      | G171_gp015       |
| 251 | PJG4_003         | PAK_P200125      | G171_gp157       | PAKP400124       |
| 252 | PJG4_017         | PAK_P100147c     | PAKP400141c      | PAK_P200142c     |
| 253 | LSL40145         | PAK_P500124      | PAK_P30126       | PAK_P100121      |
| 254 | NC_019918_000090 | PAK_P200133c     | PAKP400132c      | G171_gp149       |
| 255 | NC_019918_000100 | PAK_P200134c     | PAK_P100139c     | PAKP400133c      |
| 256 | NC_019918_000180 | PAK_P100149c     | PAKP400143c      | PAK_P200144c     |
| 257 | NC_019918_000980 | PAKP400043       | PAK_P200043      | PAK_P100043      |
| 258 | NC_019918_000990 | PAKP400044       | PAK_P200044      | PAK_P100044      |
| 259 | PAK_P100051      | G171_gp071       | PAK_P200050      | PAKP400050       |
| 260 | PAK_P100129c     | G171_gp002       | PAKP400122c      | PAK_P200123c     |
| 261 | PAK_P100170c     | G171_gp120       | PAK_P200165c     | PAKP400164c      |
| 262 | CHA_P10076       | PAK_P30075       | PAK_P500076      |                  |
| 263 | CHA_P10094       | PAK_P500094      | PAK_P30095       |                  |
| 264 | CHA_P10102       | PAK_P500102      | PAK_P30103       |                  |
| 265 | CHA_P10104       | PAK_P30105       | KPP10_99         |                  |
| 266 | CHA_P10106       | PAK_P500107      | LSL40126         |                  |
| 267 | CHA_P10111c      | CHA_P10113c      | PAK_P500112c     |                  |
| 268 | CHA_P10130       | PAK_P500130      | PAK_P30133       |                  |
| 269 | CHA_P10132       | LSL40152         | PAK_P500131      |                  |
| 270 | CHA_P10136       | PAK_P30136       | KPP10_121        |                  |
| 271 | CHA_P10138c      | PAK_P500139c     | PAK_P30138c      |                  |
| 272 | CHA_P10149c      | PAK_P500150c     | PAK_P30149c      |                  |
| 273 | CHA_P10161       | PAK_P30161       | PAK_P500162      |                  |
| 274 | PJG4_075         | PAK_P200016      | PAKP400017       |                  |
| 275 | PJG4_142         | NC_019918_001390 | G171_gp034       |                  |
| 276 | PJG4_168         | G171_gp010       | NC_019918_001620 |                  |
| 277 | PJG4_171         | NC_019918_001670 | PAK_P100125      |                  |
| 278 | PJG4_036         | PAKP400160c      | PAK_P200161c     |                  |
| 279 | PJG4_040         | NC_019918_000380 | PAK_P200166c     |                  |
| 280 | LSL40127         | PAK_P100127      | G171_gp004       |                  |
| 281 | NC_019918_001650 | G171_gp007       | PAK_P100123      |                  |
| 282 | PAK_P100048      | PAKP400048       | PAK_P200048      |                  |
| 283 | PAK_P100049      | PAKP400048.1     | PAK_P200048.1    |                  |
| 284 | PAK_P100050      | PAK_P200049      | PAKP400049       |                  |
| 285 | PAK_P100091      | PAKP400089       | PAK_P200088      |                  |
| 286 | PAK_P100169c     | PAKP400163c      | PAK_P200164c     |                  |
| 287 | CHA_P10090       | KPP10_87         |                  |                  |
| 288 | CHA_P10110c      | CHA_P10112c      |                  |                  |
| 289 | CHA_P10131       | LSL40151         |                  |                  |
| 290 | PJG4_070         | PAKP400012       |                  |                  |
| 291 | PJG4_086         | KPP10_29         |                  |                  |
| 292 | PJG4_103         | G171_gp076       |                  |                  |
| 293 | PJG4_107         | NC_019918_001030 |                  |                  |
| 294 | PJG4_123         | G171_gp055       |                  |                  |
| 295 | PJG4_145         | NC_019918_001420 |                  |                  |
| 296 | PJG4_014         | NC_019918_000140 |                  |                  |
| 297 | PJG4_039         | NC_019918_000370 |                  |                  |
| 298 | PJG4_058         | NC_019918_000570 |                  |                  |
| 299 | KPP10_74         | LSL40092         |                  |                  |
| 300 | KPP10_132        | LSL40001c        |                  |                  |
| 301 | LSL40123         | PAK_P500104      |                  |                  |
| 302 | LSL40124         | PAK_P500105      |                  |                  |

|     |                  |              |
|-----|------------------|--------------|
| 303 | LSL40131         | PAK_P30112.1 |
| 304 | LSL40132         | PAK_P30113   |
| 305 | NC_019918_000160 | G171_gp141   |
| 306 | NC_019918_000970 | G171_gp077   |
| 307 | NC_019918_001040 | G171_gp072   |
| 308 | NC_019918_001240 | G171_gp050   |
| 309 | NC_019918_001300 | G171_gp044   |
| 310 | NC_019918_001520 | G171_gp021   |
| 311 | PAK_P100085      | G171_gp040   |
| 312 | PAK_P100102      | PAK_P200099  |
| 313 | PAK_P100108      | PAKP400103   |
| 314 | PAK_P100143c     | G171_gp145   |
| 315 | PAK_P100144c     | G171_gp144   |
| 316 | PAK_P100180c     | PAK_P200175c |
| 317 | PAK_P100181c     | PAKP400173c  |
| 318 | PAK_P200116      | PAKP400115   |
| 319 | PAK_P200122      | PAKP400121   |
| 320 | PAK_P200138c     | PAKP400137c  |
| 321 | PAK_P200139c     | PAKP400138c  |
| 322 | PAK_P30090       | PAK_P500090  |
| 323 | CHA_P10034       |              |
| 324 | CHA_P10083       |              |
| 325 | PJG4_099         |              |
| 326 | PJG4_100         |              |
| 327 | PJG4_147         |              |
| 328 | PJG4_157         |              |
| 329 | PJG4_164         |              |
| 330 | PJG4_173         |              |
| 331 | PJG4_002         |              |
| 332 | PJG4_013         |              |
| 333 | PJG4_019         |              |
| 334 | KPP10_32         |              |
| 335 | KPP10_36         |              |
| 336 | KPP10_59         |              |
| 337 | KPP10_80         |              |
| 338 | KPP10_101        |              |
| 339 | KPP10_104        |              |
| 340 | KPP10_108        |              |
| 341 | KPP10_115        |              |
| 342 | KPP10_117        |              |
| 343 | KPP10_122        |              |
| 344 | LSL40098         |              |
| 345 | LSL40107         |              |
| 346 | LSL40111         |              |
| 347 | LSL40119         |              |
| 348 | LSL40122         |              |
| 349 | LSL40133         |              |
| 350 | LSL40155         |              |
| 351 | LSL40157c        |              |
| 352 | NC_019918_000250 |              |
| 353 | NC_019918_000280 |              |
| 354 | NC_019918_000430 |              |
| 355 | NC_019918_000750 |              |
| 356 | NC_019918_000790 |              |
| 357 | NC_019918_000930 |              |
| 358 | NC_019918_000940 |              |
| 359 | NC_019918_000960 |              |
| 360 | NC_019918_001060 |              |
| 361 | NC_019918_001090 |              |
| 362 | NC_019918_001130 |              |
| 363 | NC_019918_001220 |              |

364 NC\_019918\_001350  
365 NC\_019918\_001380  
366 NC\_019918\_001660  
367 PAK\_P100040  
368 PAK\_P100075  
369 PAK\_P100104  
370 PAK\_P100131  
371 PAK\_P100136c  
372 PAK\_P100160c  
373 PAK\_P100178  
374 PAK\_P100179c  
375 PAK\_P200101  
376 PAK\_P200102  
377 PAK\_P200105  
378 PAK\_P200120  
379 PAK\_P200173  
380 PAK\_P200174  
381 PAK\_P30107  
382 PAK\_P30109  
383 PAK\_P30110  
384 PAK\_P30112  
385 PAK\_P30129  
386 PAK\_P30134  
387 PAKP400074  
388 PAKP400104  
389 PAKP400172  
390 PAK\_P500015  
391 PAK\_P500022  
392 PAK\_P500023  
393 PAK\_P500111c  
394 G171\_gp105  
395 G171\_gp100  
396 G171\_gp094  
397 G171\_gp049  
398 G171\_gp028  
399 G171\_gp025  
400 G171\_gp019  
401 G171\_gp003  
402 G171\_gp154  
403 G171\_gp139  
404 G171\_gp137
