# Supplementary material for: The Search for Therapeutic Bacteriophages Uncovers One New Subfamily and Two New Genera of Pseudomonas-Infecting Myoviridae
Source: PubMed Central journal article supplement (PMC4309531; doi:10.1371/journal.pone.0117163), 2015-01-28
Supplement: pone.0117163.s006.pdf [file pone.0117163.s006.pdf]

Table S5. Families of core ORFs and families with putative functions

| Family Number | Gene identifier                |                    |                   |                 |                   |                       |                               |                    |                  |                   |                 | Putative function                                                  |
|---------------|--------------------------------|--------------------|-------------------|-----------------|-------------------|-----------------------|-------------------------------|--------------------|------------------|-------------------|-----------------|--------------------------------------------------------------------|
|               | PAK_P1-like                    |                    |                   |                 |                   |                       | KPP10-like                    |                    |                  |                   |                 |                                                                    |
|               | PAK_P1                         | PAK_P2             | PAK_P4            | JG004           | PaP1              | C2-10_Ab1             | PAK_P3                        | PAK_P5             | KPP10            | CHA_P1            | LSL4            |                                                                    |
| 1             | <i>PAK_P100001<sup>a</sup></i> | <i>PAK_P200001</i> | <i>PAKP400001</i> | <i>PJG4_059</i> | <i>G171_gp112</i> | <i>YP_007236868.1</i> | <b>PAK_P30001<sup>b</sup></b> | <b>PAK_P500001</b> | <b>KPP10_3</b>   | <b>CHA_P10001</b> | <b>LSL40018</b> | Large terminase subunit                                            |
| 2             | <i>PAK_P100002</i>             | <i>PAK_P200002</i> | <i>PAKP400002</i> | <i>PJG4_060</i> | <i>G171_gp111</i> | <i>YP_007236869.1</i> | <b>PAK_P30002<sup>c</sup></b> | <b>PAK_P500002</b> | <b>KPP10_4</b>   | <b>CHA_P10002</b> | <b>LSL40019</b> | Portal protein                                                     |
| 3             | <i>PAK_P100003</i>             | <i>PAK_P200003</i> | <i>PAKP400003</i> | <i>PJG4_061</i> | <i>G171_gp110</i> | <i>YP_007236870.1</i> | <b>PAK_P30003</b>             | <b>PAK_P500003</b> | <b>KPP10_5</b>   | <b>CHA_P10003</b> | <b>LSL40020</b> | DNA methyltransferase                                              |
| 4             | <i>PAK_P100004</i>             | <i>PAK_P200004</i> | <i>PAKP400004</i> | <i>PJG4_062</i> | <i>G171_gp109</i> | <i>YP_007236871.1</i> | <b>PAK_P30004<sup>a</sup></b> | <b>PAK_P500004</b> | <b>KPP10_6</b>   | <b>CHA_P10004</b> | <b>LSL40021</b> |                                                                    |
| 5             | <i>PAK_P100005</i>             | <i>PAK_P200005</i> | <i>PAKP400005</i> | <i>PJG4_063</i> | <i>G171_gp108</i> | <i>YP_007236872.1</i> | <b>PAK_P30005<sup>c</sup></b> | <b>PAK_P500005</b> | <b>KPP10_7</b>   | <b>CHA_P10005</b> | <b>LSL40022</b> | Decorating protein?                                                |
| 6             | <i>PAK_P100006</i>             | <i>PAK_P200006</i> | <i>PAKP400006</i> | <i>PJG4_064</i> | <i>G171_gp107</i> | <i>YP_007236873.1</i> | <b>PAK_P30006<sup>c</sup></b> | <b>PAK_P500006</b> | <b>KPP10_8</b>   | <b>CHA_P10006</b> | <b>LSL40023</b> | Major capsid protein                                               |
| 7             | <i>PAK_P100007</i>             | <i>PAK_P200007</i> | <i>PAKP400007</i> | <i>PJG4_065</i> | <i>G171_gp106</i> | <i>YP_007236874.1</i> | <b>PAK_P30007<sup>c</sup></b> | <b>PAK_P500007</b> | <b>KPP10_9</b>   | <b>CHA_P10007</b> | <b>LSL40024</b> |                                                                    |
| 8             | <i>PAK_P100009</i>             | <i>PAK_P200009</i> | <i>PAKP400009</i> | <i>PJG4_067</i> | <i>G171_gp104</i> | <i>YP_007236876.1</i> | <b>PAK_P30009<sup>c</sup></b> | <b>PAK_P500009</b> | <b>KPP10_11</b>  | <b>CHA_P10009</b> | <b>LSL40026</b> | Head-tail adaptor                                                  |
| 9             | <i>PAK_P100011</i>             | <i>PAK_P200011</i> | <i>PAKP400011</i> | <i>PJG4_069</i> | <i>G171_gp102</i> | <i>YP_007236878.1</i> | <b>PAK_P30011<sup>c</sup></b> | <b>PAK_P500011</b> | <b>KPP10_13</b>  | <b>CHA_P10011</b> | <b>LSL40028</b> | Tail sheath protein                                                |
| 10            | <i>PAK_P100012</i>             | <i>PAK_P200012</i> | <i>PAKP400013</i> | <i>PJG4_071</i> | <i>G171_gp101</i> | <i>YP_007236879.1</i> | <b>PAK_P30012<sup>c</sup></b> | <b>PAK_P500012</b> | <b>KPP10_14</b>  | <b>CHA_P10012</b> | <b>LSL40029</b> | Structural protein                                                 |
| 11            | <i>PAK_P100014</i>             | <i>PAK_P200014</i> | <i>PAKP400015</i> | <i>PJG4_073</i> | <i>G171_gp099</i> | <i>YP_007236881.1</i> | <b>PAK_P30014<sup>c</sup></b> | <b>PAK_P500014</b> | <b>KPP10_16</b>  | <b>CHA_P10014</b> | <b>LSL40031</b> | Distal tail protein                                                |
| 12            | <i>PAK_P100018</i>             | <i>PAK_P200018</i> | <i>PAKP400019</i> | <i>PJG4_077</i> | <i>G171_gp096</i> | <i>YP_007236884.1</i> | <b>PAK_P30018<sup>c</sup></b> | <b>PAK_P500018</b> | <b>KPP10_20</b>  | <b>CHA_P10018</b> | <b>LSL40035</b> | Tail protein?                                                      |
| 13            | <i>PAK_P100019</i>             | <i>PAK_P200019</i> | <i>PAKP400020</i> | <i>PJG4_078</i> | <i>G171_gp095</i> | <i>YP_007236886.1</i> | <b>PAK_P30019<sup>c</sup></b> | <b>PAK_P500019</b> | <b>KPP10_21</b>  | <b>CHA_P10019</b> | <b>LSL40036</b> |                                                                    |
| 14            | <i>PAK_P100021</i>             | <i>PAK_P200021</i> | <i>PAKP400022</i> | <i>PJG4_080</i> | <i>G171_gp093</i> | <i>YP_007236888.1</i> | <b>PAK_P30021<sup>c</sup></b> | <b>PAK_P500021</b> | <b>KPP10_23</b>  | <b>CHA_P10021</b> | <b>LSL40038</b> | Baseplate assembly protein                                         |
| 15            | <i>PAK_P100024</i>             | <i>PAK_P200024</i> | <i>PAKP400025</i> | <i>PJG4_083</i> | <i>G171_gp090</i> | <i>YP_007236891.1</i> | <b>PAK_P30024<sup>a</sup></b> | <b>PAK_P500025</b> | <b>KPP10_26</b>  | <b>CHA_P10024</b> | <b>LSL40041</b> |                                                                    |
| 16            | <i>PAK_P100025</i>             | <i>PAK_P200025</i> | <i>PAKP400026</i> | <i>PJG4_084</i> | <i>G171_gp089</i> | <i>YP_007236892.1</i> | <b>PAK_P30025<sup>c</sup></b> | <b>PAK_P500026</b> | <b>KPP10_27</b>  | <b>CHA_P10025</b> | <b>LSL40042</b> | Tail fiber?                                                        |
| 17            | <i>PAK_P100026</i>             | <i>PAK_P200026</i> | <i>PAKP400027</i> | <i>PJG4_085</i> | <i>G171_gp088</i> | <i>YP_007236893.1</i> | <b>PAK_P30026</b>             | <b>PAK_P500027</b> | <b>KPP10_28</b>  | <b>CHA_P10026</b> | <b>LSL40043</b> | Tail fiber?                                                        |
| 18            | <i>PAK_P100028</i>             | <i>PAK_P200028</i> | <i>PAKP400029</i> | <i>PJG4_087</i> | <i>G171_gp086</i> | <i>YP_007236895.1</i> | <b>PAK_P30028</b>             | <b>PAK_P500029</b> | <b>KPP10_30</b>  | <b>CHA_P10028</b> | <b>LSL40045</b> | Endolysin?                                                         |
| 20            | <i>PAK_P100076</i>             | <i>PAK_P200074</i> | <i>PAKP400075</i> | <i>PJG4_130</i> | <i>G171_gp048</i> | <i>YP_007236936.1</i> | <b>PAK_P30065</b>             | <b>PAK_P500066</b> | <b>KPP10_64</b>  | <b>CHA_P10066</b> | <b>LSL40082</b> | Thymidylate synthase or thymidylate synthase complementing protein |
| 21            | <i>PAK_P100112</i>             | <i>PAK_P200109</i> | <i>PAKP400108</i> | <i>PJG4_161</i> | <i>G171_gp017</i> | <i>YP_007236965.1</i> | <b>PAK_P30092</b>             | <b>PAK_P500092</b> | <b>KPP10_89</b>  | <b>CHA_P10092</b> | <b>LSL40109</b> |                                                                    |
| 22            | <i>PAK_P100115</i>             | <i>PAK_P200111</i> | <i>PAKP400110</i> | <i>PJG4_165</i> | <i>G171_gp014</i> | <i>YP_007236968.1</i> | <b>PAK_P30099</b>             | <b>PAK_P500098</b> | <b>KPP10_94</b>  | <b>CHA_P10098</b> | <b>LSL40115</b> |                                                                    |
| 23            | <i>PAK_P100118</i>             | <i>PAK_P200115</i> | <i>PAKP400114</i> | <i>PJG4_167</i> | <i>G171_gp011</i> | <i>YP_007236971.1</i> | <b>PAK_P30104</b>             | <b>PAK_P500103</b> | <b>KPP10_98</b>  | <b>CHA_P10103</b> | <b>LSL40121</b> |                                                                    |
| 24            | <i>PAK_P100159</i>             | <i>PAK_P200154</i> | <i>PAKP400153</i> | <i>PJG4_029</i> | <i>G171_gp129</i> | <i>YP_007236848.1</i> | <b>PAK_P30152</b>             | <b>PAK_P500153</b> | <b>KPP10_135</b> | <b>CHA_P10152</b> | <b>LSL40004</b> | Cell wall hydrolase                                                |
| 25            | <i>PAK_P100166</i>             | <i>PAK_P200160</i> | <i>PAKP400159</i> | <i>PJG4_035</i> | <i>G171_gp123</i> | <i>YP_007236855.1</i> | <b>PAK_P30155</b>             | <b>PAK_P500156</b> | <b>KPP10_138</b> | <b>CHA_P10155</b> | <b>LSL40007</b> |                                                                    |
| 26            | <i>PAK_P100163</i>             | <i>PAK_P200157</i> | <i>PAKP400156</i> | <i>PJG4_032</i> | <i>G171_gp126</i> | <i>YP_007236852.1</i> | <b>PAK_P30156</b>             | <b>PAK_P500157</b> | <b>KPP10_139</b> | <b>CHA_P10156</b> | <b>LSL40008</b> | dCMP deaminase                                                     |
| 27            | <i>PAK_P100167</i>             | <i>PAK_P200162</i> | <i>PAKP400161</i> | <i>PJG4_037</i> | <i>G171_gp122</i> | <i>YP_007236856.1</i> | <b>PAK_P30158</b>             | <b>PAK_P500159</b> | <b>KPP10_141</b> | <b>CHA_P10158</b> | <b>LSL40010</b> |                                                                    |
| 28            | PAK_P100008                    | PAK_P200008        | PAKP400008        | PJG4_066        |                   | YP_007236875.1        | PAK_P30008 <sup>c</sup>       | PAK_P500008        | KPP10_10         | CHA_P10008        | LSL40025        |                                                                    |
| 29            | PAK_P100013                    | PAK_P200013        | PAKP400014        | PJG4_072        |                   | YP_007236880.1        | PAK_P30013 <sup>c</sup>       | PAK_P500013        | KPP10_15         | CHA_P10013        | LSL40030        | Structural protein                                                 |
| 31            | PAK_P100020                    | PAK_P200020        | PAKP400021        | PJG4_079        |                   | YP_007236887.1        | PAK_P30020 <sup>c</sup>       | PAK_P500020        | KPP10_22         | CHA_P10020        | LSL40037        | Tail protein?                                                      |

|     |             |             |            |          |            |                |                         |             |           |            |          |                                                             |
|-----|-------------|-------------|------------|----------|------------|----------------|-------------------------|-------------|-----------|------------|----------|-------------------------------------------------------------|
| 35  | PAK_P100022 | PAK_P200022 | PAKP400023 | PJG4_081 | G171_gp092 |                | PAK_P30022 <sup>c</sup> |             | KPP10_24  | CHA_P10022 | LSL40039 | Lysozyme                                                    |
| 36  | PAK_P100027 | PAK_P200027 | PAKP400028 |          | G171_gp087 | YP_007236894.1 | PAK_P30027 <sup>c</sup> | PAK_P500028 |           | CHA_P10027 | LSL40044 | Tail fiber                                                  |
| 54  | PAK_P100017 | PAK_P200017 | PAKP400018 | PJG4_076 | G171_gp097 | YP_007236883.1 |                         |             |           |            |          | Tape measure protein                                        |
| 60  | PAK_P100038 | PAK_P200038 | PAKP400039 | PJG4_096 | G171_gp079 | YP_007236902.1 |                         |             |           |            |          | RNA ligase?                                                 |
| 65  | PAK_P100054 | PAK_P200053 | PAKP400053 | PJG4_110 | G171_gp069 | YP_007236917.1 |                         |             |           |            |          | Primase/helicase                                            |
| 66  | PAK_P100055 | PAK_P200054 | PAKP400054 | PJG4_111 | G171_gp068 | YP_007236918.1 |                         |             |           |            |          | DNA polymerase                                              |
| 77  | PAK_P100078 | PAK_P200076 | PAKP400077 | PJG4_132 | G171_gp046 | YP_007236938.1 |                         |             |           |            |          | Putative ribonucleotide-diphosphate reductase beta subunit  |
| 78  | PAK_P100079 | PAK_P200077 | PAKP400078 | PJG4_133 | G171_gp045 | YP_007236939.1 |                         |             |           |            |          | Putative ribonucleotide-diphosphate reductase alpha subunit |
| 101 | PAK_P100148 | PAK_P200143 | PAKP400142 | PJG4_018 | G171_gp140 | YP_007236838.1 |                         |             |           |            |          | Nicotinamide phosphoribosyl transferase                     |
| 102 | PAK_P100150 | PAK_P200145 | PAKP400144 | PJG4_020 | G171_gp138 | YP_007236840.1 |                         |             |           |            |          | Phosphoribosylpyrophosphate synthetase                      |
| 109 | PAK_P100162 | PAK_P200156 | PAKP400155 | PJG4_031 | G171_gp127 | YP_007236851.1 |                         |             |           |            |          | DNA ligase                                                  |
| 118 |             |             |            |          |            |                | PAK_P30010 <sup>c</sup> | PAK_P500010 | KPP10_12  | CHA_P10010 | LSL40027 |                                                             |
| 119 |             |             |            |          |            |                | PAK_P30017 <sup>c</sup> | PAK_P500017 | KPP10_19  | CHA_P10017 | LSL40034 | Tape measure protein                                        |
| 120 |             |             |            |          |            |                | PAK_P30023 <sup>c</sup> | PAK_P500024 | KPP10_25  | CHA_P10023 | LSL40040 | Baseplate protein                                           |
| 129 |             |             |            |          |            |                | PAK_P30044              | PAK_P500045 | KPP10_43  | CHA_P10045 | LSL40061 | RNA ligase?                                                 |
| 134 |             |             |            |          |            |                | PAK_P30049              | PAK_P500050 | KPP10_48  | CHA_P10050 | LSL40066 | Primase/helicase                                            |
| 135 |             |             |            |          |            |                | PAK_P30050              | PAK_P500051 | KPP10_49  | CHA_P10051 | LSL40067 | DNA polymerase                                              |
| 155 |             |             |            |          |            |                | PAK_P30072 <sup>c</sup> | PAK_P500073 | KPP10_71  | CHA_P10073 | LSL40089 |                                                             |
| 150 |             |             |            |          |            |                | PAK_P30067              | PAK_P500068 | KPP10_66  | CHA_P10068 | LSL40084 | Putative ribonucleotide reductase alpha subunit             |
| 152 |             |             |            |          |            |                | PAK_P30069              | PAK_P500070 | KPP10_68  | CHA_P10070 | LSL40086 | Putative ribonucleotide reductase beta subunit              |
| 194 |             |             |            |          |            |                | PAK_P30154              | PAK_P500155 | KPP10_137 | CHA_P10154 | LSL40006 | DNA ligase                                                  |
| 197 |             |             |            |          |            |                | PAK_P30160 <sup>c</sup> | PAK_P500161 | KPP10_143 | CHA_P10160 | LSL40012 |                                                             |
| 201 |             |             |            |          |            |                | PAK_P30165              | PAK_P500166 | KPP10_1   | CHA_P10165 | LSL40016 | Terminase?                                                  |
| 202 |             |             |            |          |            |                | PAK_P30166 <sup>c</sup> | PAK_P500167 | KPP10_2   | CHA_P10166 | LSL40017 | Head fiber protein                                          |
| 244 |             |             |            |          |            |                | PAK_P30148              | PAK_P500149 | KPP10_131 | CHA_P10148 |          | DNA helicase                                                |

<sup>a</sup>, italics correspond to the core ORFs of the PAK\_P1-like clade

<sup>b</sup>, bold correspond to the core ORFs of the KPP10-like clade

<sup>c</sup>, proteins identified by mass spectrometry analysis of the PAK\_P3 virion
