# Supplementary material for: The Search for Therapeutic Bacteriophages Uncovers One New Subfamily and Two New Genera of Pseudomonas-Infecting Myoviridae
Source: PubMed Central journal article supplement (PMC4309531; doi:10.1371/journal.pone.0117163), 2015-01-28
Supplement: pone.0117163.s007.pdf [file pone.0117163.s007.pdf]

A

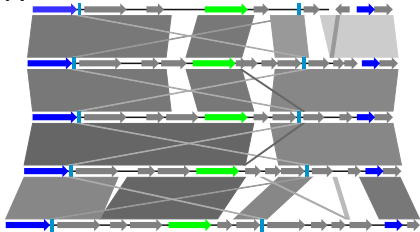

B

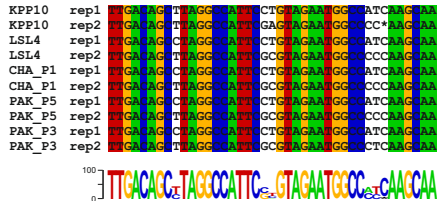

**Figure S1: Identification of repeated promoter-like regions of the KPP10-like clade**

A. Representation of the homology (Blastn) between the five KPP10-like bacteriophages in which 41-nt

repeats were identified (represented as light blue boxes). B. Alignment of the total of 10 repeats identified

in the five genomes, with colors indicating strictly conserved bases, with a WebLogo representation of the

consensus (the height of the letters represents their frequency at each position) shown underneath.
